# Supplementary material
Source: Springer Nature journal article supplement (https://www.springermedizin.de/resource/supplementary/13054_2012_1090_MOESM2_ESM.pdf/9711154)
Supplement: MOESM2 [file 9711154]

Discovery

Vienna Cohort  
Age  $\geq$  18,  
in ICU + Sepsis  
N = 134

Duke Cohort  
Age  $\geq$  18,  
At least 1 risk factor<sup>1</sup>  
N = 123

Mayo Cohort  
Age  $\geq$  18,  
At least 1 risk factor<sup>2</sup>  
N = 265

Best Two Markers

Validation

Sapphire Study  
35 sites  
(20 North America, 15 Europe)  
Age > 21, Critically Ill<sup>3</sup>,  
no AKI (Stage 2 or 3)<sup>4</sup>  
N = 744

16 patients excluded  
(2 withdrew consent, 7  
lost to follow-up, 7 with  
invalid or missing test  
results)

N = 728<sup>5</sup>

No AKI  
N = 416

AKI Stage 1  
N = 211

AKI Stage 2  
N = 83

AKI Stage 3  
N = 18

Within  
12 hrs
